# Supplementary material for: The Meaning of “Hygiene” and Its Linked Practices in a Low-Income Urban Community in Bangladesh
Source: MDPI journal article supplement (doi:10.3390/ijerph19169823), 2022-08-09
Supplement: s1 [file s1]

**Table S1: Different terminologies used in this manuscript**

|                                       |                                                                                                                                                                                             |
|---------------------------------------|---------------------------------------------------------------------------------------------------------------------------------------------------------------------------------------------|
| Personal hygiene                      | Cleaning of body parts including bathing, washing face, hands, feet, and genital areas, anus.                                                                                               |
| Domestic hygiene                      | Cleaning of cloth, kitchen utensils/dishes, kitchen space, rooms, yard and toilets, and bathrooms.                                                                                          |
| Rapport                               | A trust-building process to develop a harmonious relationship with community people and study participants to understand each other's feelings or ideas and communicate well.               |
| Ablution                              | A mandatory practice Muslims should perform before religious prayers. It requires rinsing face, hands, forearms, ears, nostrils, mouth and feet with water three times during each episode. |
| Religious prayers<br>( <i>namaj</i> ) | <i>Namaj</i> is a ritual prayer prescribed by Islam, it has to be performed five times a day, and ablution before <i>namaj</i> is mandatory to ensure holiness                              |
| Unholy                                | Contact with feces and urine, blood and menstrual blood, fluid after childbirth, and body after sexual intercourse.                                                                         |
| Holy state                            | The whole body is cleaned in a way which make sure that there is no body fluid or any other substance smeared anywhere in the body.                                                         |
| Religious bathing                     | A mandatory bathing and cleaning practices. In Islam, which is mandatory after the menstruation is over and after sexual intercourse.                                                       |
| ' <i>Dhila kulukh</i> '               | A small piece of cloth or mud ball to wipe the genital area for three times in each episode after defecation.                                                                               |
